# Supplementary material for: Multiple Roles of the Low-Affinity Calcium Uptake System in Drechslerella dactyloides, a Nematode-Trapping Fungus That Forms Constricting Rings
Source: MDPI journal article supplement (doi:10.3390/jof9100975), 2023-09-28
Supplement: s1 [file s1]

## Supplementary Materials

Article

# Multiple Roles of the Low-Affinity Calcium Uptake System in *Drechslerella dactyloides*, a Nematode-Trapping Fungus That Forms Constricting Rings

Xiaozhou Zhao <sup>1</sup>, Yani Fan <sup>2,3</sup>, Liao Zhang <sup>1</sup>, Weiwei Zhang <sup>2,3</sup>, Meichun Xiang <sup>2,3</sup>, Seogchan Kang <sup>4</sup>, Shunxian Wang <sup>1,\*</sup> and Xingzhong Liu <sup>1,\*</sup>

<sup>1</sup> State Key Laboratory of Medicinal Chemical Biology, Key Laboratory of Molecular Microbiology and Technology of the Ministry of Education, Department of Microbiology, College of Life Science, Nankai University, Tianjin 300071, China

<sup>2</sup> State Key Laboratory of Mycology, Institute of Microbiology, Chinese Academy of Sciences, Beijing 100101, China

<sup>3</sup> University of Chinese Academy of Sciences, Beijing 100049, China

<sup>4</sup> Department of Plant Pathology & Environmental Microbiology, The Pennsylvania State University, University Park, PA 16802, USA; sxk55@psu.edu

\* Correspondence: shunxianwang@nankai.edu.cn (S.W.); liuxz@nankai.edu.cn (X.L.)

Table S1 Primers used in this study

| Primers       | Sequence (5' to 3')            |
|---------------|--------------------------------|
| HYG-540F      | TTGCAAGACCTGCCTGAAACCGAACTGCCC |
| HYG-540R      | AACCAAGCTCTGATAGAGTTGGTCAAGACC |
| Tublin-RT-F   | CAAGGTCAGCATGAAGGAG            |
| Tublin-RT-R   | CGATAATGAGGAGGAAGGT            |
| DdaFIG_1-RT-F | GATGCCGAGTCGATTCGTTTC          |
| DdaFIG_1-RT-R | CACCAACAAGCCAATCGTTAC          |
| DdaFIG_2-RT-F | TCCGCATCGACGACCACTATG          |
| DdaFIG_2-RT-R | GATCCGCACAGCCATTGCGA           |

Table S2 Relative expression levels of *DdaFIG\_1* in transformants carrying the *DdaFIG\_1* RNAi construct

| Target           | Sample               | Control | Expression | Expression SEM | Corrected Expression SEM | Mean Cq | Cq SEM  |
|------------------|----------------------|---------|------------|----------------|--------------------------|---------|---------|
| <i>DdaFIG_1</i>  | WT                   | *       | 1.00000    | 0.07212        | 0.07212                  | 24.76   | 0.09217 |
| <i>DdaFIG_1</i>  | <i>DdaFIG_2Ri-25</i> |         | 0.49172    | 0.09128        | 0.09128                  | 29.14   | 0.02594 |
| <i>DdaFIG_1</i>  | <i>DdaFIG_2Ri-29</i> |         | 0.53781    | 0.03280        | 0.03280                  | 27.85   | 0.08963 |
| <i>DdaTublin</i> | WT                   | *       |            |                |                          | 18.11   | 0.58704 |
| <i>DdaTublin</i> | <i>DdaFIG_2Ri-25</i> |         |            |                |                          | 21.45   | 0.10040 |
| <i>DdaTublin</i> | <i>DdaFIG_2Ri-29</i> |         |            |                |                          | 20.30   | 0.05672 |

Table S3 Relative expression levels of *DdaFIG\_2* in transformants carrying the *DdaFIG\_2* RNAi construct

| Target           | Sample               | Control | Expression | Expression SEM | Corrected Expression SEM | Mean Cq | Cq SEM  |
|------------------|----------------------|---------|------------|----------------|--------------------------|---------|---------|
| <i>DdaFIG_2</i>  | WT                   | *       | 1.00000    | 0.08365        | 0.08365                  | 21.79   | 0.08365 |
| <i>DdaFIG_2</i>  | <i>DdaFIG_2Ri-31</i> |         | 0.51723    | 0.05525        | 0.05525                  | 27.17   | 0.16000 |
| <i>DdaFIG_2</i>  | <i>DdaFIG_2Ri-46</i> |         | 0.58854    | 0.03640        | 0.03640                  | 25.55   | 0.09073 |
| <i>DdaTublin</i> | WT                   | *       |            |                |                          | 16.78   | 0.45740 |
| <i>DdaTublin</i> | <i>DdaFIG_2Ri-31</i> |         |            |                |                          | 21.20   | 0.03771 |
| <i>DdaTublin</i> | <i>DdaFIG_2Ri-46</i> |         |            |                |                          | 19.77   | 0.06381 |

Table S4 Relative expression levels of *DdaFIG\_1* and *DdaFIG\_2* in transformants carrying the *DdaFIG\_1,2* RNAi construct

| Target           | Sample                 | Control | Expression | Expression SEM | Corrected Expression SEM | Mean Cq | Cq SEM  |
|------------------|------------------------|---------|------------|----------------|--------------------------|---------|---------|
| <i>DdaFIG_1</i>  | WT                     | *       | 1.00000    | 0.07212        | 0.07212                  | 24.76   | 0.09217 |
| <i>DdaFIG_1</i>  | <i>DdaFIG_1,2Ri-16</i> |         | 0.51388    | 0.03892        | 0.03892                  | 25.52   | 0.11150 |
| <i>DdaFIG_1</i>  | <i>DdaFIG_1,2Ri-27</i> |         | 0.48963    | 0.05697        | 0.05697                  | 26.63   | 0.16623 |
| <i>DdaTublin</i> | WT                     | *       |            |                |                          | 18.11   | 0.58704 |
| <i>DdaTublin</i> | <i>DdaFIG_1,2Ri-16</i> |         |            |                |                          | 17.91   | 0.41693 |
| <i>DdaTublin</i> | <i>DdaFIG_1,2Ri-27</i> |         |            |                |                          | 18.94   | 0.23892 |
| <i>DdaFIG_2</i>  | WT                     | *       | 1.00000    | 0.08365        | 0.08365                  | 21.79   | 0.08365 |
| <i>DdaFIG_2</i>  | <i>DdaFIG_1,2Ri-16</i> |         | 0.53811    | 0.03960        | 0.03960                  | 24.50   | 0.10786 |
| <i>DdaFIG_2</i>  | <i>DdaFIG_1,2Ri-27</i> |         | 0.46459    | 0.05281        | 0.05281                  | 24.02   | 0.16623 |
| <i>DdaTublin</i> | WT                     | *       |            |                |                          | 16.78   | 0.45740 |
| <i>DdaTublin</i> | <i>DdaFIG_1,2Ri-16</i> |         |            |                |                          | 18.59   | 0.34042 |
| <i>DdaTublin</i> | <i>DdaFIG_1,2Ri-27</i> |         |            |                |                          | 17.00   | 0.28377 |

Table S5 Conidiation (conidia numbers) of the wild type strain and transformants containing individual RNAi constructs

| Strain                 | Rep1  | Rep2  | Rep3  | Rep4  | Rep5  | Rep6  | Rep7  | Average | S.D. |
|------------------------|-------|-------|-------|-------|-------|-------|-------|---------|------|
| WT                     | 90000 | 83000 | 76000 | 95000 | 81000 | 72000 | 77000 | 82000   | 8124 |
| <i>DdaFIG_1Ri-25</i>   | 36000 | 38000 | 42000 | 42000 | 40000 | 33000 | 45000 | 39429   | 4077 |
| <i>DdaFIG_1Ri-29</i>   | 35000 | 42000 | 39000 | 40000 | 34000 | 45000 | 35000 | 38571   | 4117 |
| <i>DdaFIG_2Ri-31</i>   | 42000 | 33000 | 37000 | 32000 | 40000 | 44000 | 35000 | 37571   | 4577 |
| <i>DdaFIG_2Ri-46</i>   | 38000 | 36000 | 42000 | 41000 | 40000 | 43000 | 32000 | 38857   | 3848 |
| <i>DdaFIG_1,2Ri-16</i> | 16000 | 12000 | 15000 | 15000 | 17000 | 11000 | 14000 | 14286   | 2138 |
| <i>DdaFIG_1,2Ri-27</i> | 15000 | 18000 | 14000 | 13000 | 10000 | 12000 | 15000 | 13857   | 2545 |

Table S6 Numbers of the trap formed by the wild type strain and transformants carrying individual RNAi constructs

| Strain                            | Rep1 | Rep2 | Rep3 | Rep4 | Rep5 | Rep6 | Rep7 | Average | S.D. |
|-----------------------------------|------|------|------|------|------|------|------|---------|------|
| 16 h after induction by nematodes |      |      |      |      |      |      |      |         |      |
| WT                                | 124  | 150  | 148  | 135  | 132  | 118  | 124  | 133     | 12   |
| <i>DdaFIG_1Ri-25</i>              | 88   | 90   | 89   | 78   | 66   | 96   | 75   | 83      | 10   |
| <i>DdaFIG_1Ri-29</i>              | 59   | 60   | 72   | 95   | 85   | 86   | 73   | 75      | 4    |
| <i>DdaFIG_2Ri-31</i>              | 55   | 70   | 57   | 58   | 65   | 76   | 72   | 65      | 8    |
| <i>DdaFIG_2Ri-46</i>              | 76   | 70   | 69   | 79   | 60   | 73   | 73   | 71      | 6    |
| <i>DdaFIG_1,2Ri-16</i>            | 39   | 52   | 55   | 48   | 53   | 46   | 50   | 49      | 5    |
| <i>DdaFIG_1,2Ri-27</i>            | 49   | 56   | 63   | 57   | 47   | 58   | 60   | 56      | 6    |
| 24 h after induction by nematodes |      |      |      |      |      |      |      |         |      |
| WT                                | 200  | 187  | 176  | 215  | 208  | 170  | 192  | 193     | 16   |
| <i>DdaFIG_1Ri-25</i>              | 110  | 101  | 127  | 109  | 99   | 97   | 119  | 109     | 11   |
| <i>DdaFIG_1Ri-29</i>              | 132  | 122  | 106  | 100  | 120  | 133  | 105  | 117     | 13   |
| <i>DdaFIG_2Ri-31</i>              | 128  | 128  | 97   | 107  | 115  | 130  | 123  | 118     | 13   |
| <i>DdaFIG_2Ri-46</i>              | 110  | 98   | 130  | 92   | 108  | 115  | 112  | 110     | 12   |
| <i>DdaFIG_1,2Ri-16</i>            | 79   | 87   | 75   | 80   | 76   | 69   | 74   | 77      | 6    |
| <i>DdaFIG_1,2Ri-27</i>            | 65   | 63   | 80   | 85   | 78   | 70   | 68   | 73      | 8    |

Table S7 Inflated traps (%) formed by the wild type strain and transformants carrying individual RNAi constructs

| Strain                            | Rep1  | Rep2  | Rep3  | Rep4  | Rep5  | Rep6  | Rep7  | Average | S.D. |
|-----------------------------------|-------|-------|-------|-------|-------|-------|-------|---------|------|
| 16 h after induction by nematodes |       |       |       |       |       |       |       |         |      |
| WT                                | 5.65  | 6.67  | 7.09  | 5.56  | 6.25  | 7.63  | 5.44  | 6.33    | 0.84 |
| <i>DdaFIG_1Ri-25</i>              | 3.12  | 3.61  | 4.21  | 5.13  | 4.92  | 4.17  | 5.33  | 4.36    | 0.82 |
| <i>DdaFIG_1Ri-29</i>              | 3.39  | 4.58  | 6.25  | 2.37  | 3.82  | 5.23  | 5.14  | 4.40    | 1.30 |
| <i>DdaFIG_2Ri-31</i>              | 4.55  | 5.71  | 3.95  | 2.16  | 3.08  | 2.30  | 2.78  | 3.50    | 1.30 |
| <i>DdaFIG_2Ri-46</i>              | 3.29  | 2.86  | 3.62  | 4.11  | 3.75  | 3.08  | 2.40  | 3.30    | 0.58 |
| <i>DdaFIG_1,2Ri-16</i>            | 5.13  | 2.40  | 1.36  | 2.60  | 2.83  | 2.17  | 2.50  | 2.71    | 1.16 |
| <i>DdaFIG_1,2Ri-27</i>            | 3.06  | 2.68  | 2.78  | 1.75  | 3.72  | 2.16  | 2.92  | 2.72    | 0.63 |
| 24 h after induction by nematodes |       |       |       |       |       |       |       |         |      |
| WT                                | 15.38 | 14.71 | 14.63 | 16.98 | 16.47 | 15.74 | 16.28 | 15.74   | 0.89 |
| <i>DdaFIG_1Ri-25</i>              | 12.73 | 12.13 | 12.20 | 11.01 | 11.62 | 13.40 | 11.97 | 12.15   | 0.77 |
| <i>DdaFIG_1Ri-29</i>              | 11.17 | 11.68 | 9.20  | 13.00 | 10.21 | 12.41 | 12.62 | 11.47   | 1.38 |
| <i>DdaFIG_2Ri-31</i>              | 9.96  | 9.77  | 10.31 | 7.94  | 8.70  | 7.69  | 9.35  | 9.10    | 1.02 |
| <i>DdaFIG_2Ri-46</i>              | 10.00 | 11.48 | 12.31 | 8.70  | 9.95  | 8.26  | 9.15  | 9.98    | 1.47 |
| <i>DdaFIG_1,2Ri-16</i>            | 8.23  | 4.89  | 6.67  | 9.38  | 7.57  | 7.97  | 8.11  | 7.54    | 1.42 |
| <i>DdaFIG_1,2Ri-27</i>            | 8.46  | 7.94  | 7.81  | 8.82  | 8.33  | 7.50  | 5.88  | 7.82    | 0.96 |



**Table S8 Growth rate (colony diameter (mm)) of wild type (WT) strain and the mutants under cell wall stresses**

| Strain                                    | Rep1 | Rep2 | Rep3 | Rep4 | Rep5 | Rep6 | Rep7 | Average | S.D.  |
|-------------------------------------------|------|------|------|------|------|------|------|---------|-------|
| <b>14-day-cultivation PDA</b>             |      |      |      |      |      |      |      |         |       |
| WT                                        | 37.6 | 38   | 36.9 | 37.2 | 37.5 | 37.5 | 38.2 | 37.56   | 0.443 |
| <i>DdaFIG_1Ri-25</i>                      | 32.5 | 33.6 | 32.8 | 33.2 | 33.3 | 32.9 | 33   | 33.04   | 0.360 |
| <i>DdaFIG_1Ri-29</i>                      | 33.4 | 32.8 | 33   | 33.5 | 32.8 | 33.8 | 33   | 33.19   | 0.385 |
| <i>DdaFIG_2Ri-31</i>                      | 32.8 | 33.5 | 33.4 | 33.6 | 32.8 | 31.9 | 33.6 | 33.09   | 0.628 |
| <i>DdaFIG_2Ri-46</i>                      | 33.1 | 33.5 | 32.9 | 33   | 34   | 33.8 | 33   | 33.33   | 0.439 |
| <i>DdaFIG_1,2Ri-16</i>                    | 25.7 | 26.5 | 27.1 | 26.6 | 25.9 | 26.2 | 26.8 | 26.40   | 0.497 |
| <i>DdaFIG_1,2Ri-27</i>                    | 26.5 | 27   | 27.5 | 25.8 | 26.2 | 25.8 | 26.4 | 26.46   | 0.621 |
| <b>PDA containing 0.1 mg/mL Congo red</b> |      |      |      |      |      |      |      |         |       |
| WT                                        | 36.8 | 35.2 | 37.1 | 36.5 | 35.9 | 36   | 36.4 | 36.27   | 0.632 |
| <i>DdaFIG_1Ri-25</i>                      | 35.8 | 35.6 | 36.1 | 36.5 | 35.7 | 35.8 | 36.2 | 35.96   | 0.321 |
| <i>DdaFIG_1Ri-29</i>                      | 36.2 | 36.3 | 35.8 | 36.2 | 35.7 | 36.2 | 35.9 | 36.04   | 0.237 |
| <i>DdaFIG_2Ri-31</i>                      | 36.2 | 36   | 35.9 | 36.5 | 35.7 | 35.8 | 36   | 36.01   | 0.267 |
| <i>DdaFIG_2Ri-46</i>                      | 36   | 36.4 | 35.8 | 36.3 | 36.2 | 35.7 | 35.8 | 36.03   | 0.275 |
| <i>DdaFIG_1,2Ri-16</i>                    | 37   | 36.9 | 37.2 | 37.3 | 38   | 37.8 | 36.5 | 37.24   | 0.519 |
| <i>DdaFIG_1,2Ri-27</i>                    | 36.3 | 36.6 | 36.5 | 35.6 | 37   | 37.1 | 36.3 | 36.49   | 0.501 |
| <b>PDA containing 0.2 mg/mL Congo red</b> |      |      |      |      |      |      |      |         |       |
| WT                                        | 34.2 | 33.5 | 33.9 | 34.4 | 35   | 34.2 | 34   | 34.17   | 0.464 |
| <i>DdaFIG_1Ri-25</i>                      | 34.2 | 35.1 | 34.2 | 35   | 34.9 | 35   | 35.2 | 34.8    | 0.42  |
| <i>DdaFIG_1Ri-29</i>                      | 35.5 | 35.2 | 35.9 | 35.6 | 35.3 | 35.4 | 34.8 | 35.39   | 0.344 |
| <i>DdaFIG_2Ri-31</i>                      | 34.5 | 35.1 | 33.8 | 34   | 34.6 | 35.1 | 35   | 34.59   | 0.527 |
| <i>DdaFIG_2Ri-46</i>                      | 36   | 36.4 | 35.8 | 36.3 | 36.2 | 35.7 | 35.8 | 36.03   | 0.275 |
| <i>DdaFIG_1,2Ri-16</i>                    | 37   | 36.9 | 37.2 | 37.3 | 38   | 37.8 | 36.5 | 37.24   | 0.519 |
| <i>DdaFIG_1,2Ri-27</i>                    | 35.8 | 35   | 34.8 | 35   | 35.2 | 35.8 | 34.8 | 35.2    | 0.432 |
| <b>PDA containing 0.4 mg/mL Congo red</b> |      |      |      |      |      |      |      |         |       |
| WT                                        | 33.1 | 32.1 | 32   | 31.9 | 32   | 33   | 32.4 | 32.36   | 0.5   |
| <i>DdaFIG_1Ri-25</i>                      | 33.1 | 33.5 | 32.4 | 33.3 | 33.9 | 32.3 | 32.6 | 33.01   | 0.601 |
| <i>DdaFIG_1Ri-29</i>                      | 32.8 | 32.5 | 33   | 31.9 | 32.5 | 32.4 | 32.5 | 32.51   | 0.344 |
| <i>DdaFIG_2Ri-31</i>                      | 30.2 | 30.9 | 31   | 31.2 | 31.4 | 31.5 | 32   | 31.17   | 0.562 |
| <i>DdaFIG_2Ri-46</i>                      | 31.5 | 31.9 | 32   | 32.2 | 33.3 | 32   | 31   | 31.99   | 0.706 |
| <i>DdaFIG_1,2Ri-16</i>                    | 33.6 | 34.5 | 33.8 | 34   | 33.7 | 33.4 | 32.8 | 33.69   | 0.523 |
| <i>DdaFIG_1,2Ri-27</i>                    | 32.8 | 33   | 32.7 | 33.4 | 33.5 | 32.7 | 33   | 33.01   | 0.324 |
| <b>PDA containing 0.01% SDS</b>           |      |      |      |      |      |      |      |         |       |
| WT                                        | 19.6 | 19.5 | 21   | 19   | 20   | 19.5 | 18.9 | 19.64   | 0.704 |
| <i>DdaFIG_1Ri-25</i>                      | 20   | 19.3 | 19.4 | 18.5 | 18.6 | 19   | 19.5 | 19.19   | 0.527 |
| <i>DdaFIG_1Ri-29</i>                      | 19.5 | 18.6 | 19.8 | 20.3 | 19.5 | 18.6 | 18.3 | 19.23   | 0.739 |
| <i>DdaFIG_2Ri-31</i>                      | 17.5 | 17   | 18.3 | 18.5 | 19.1 | 19.2 | 18.6 | 18.31   | 0.807 |
| <i>DdaFIG_2Ri-46</i>                      | 18.7 | 18.5 | 18.8 | 17.8 | 19.2 | 19   | 18.4 | 18.63   | 0.457 |
| <i>DdaFIG_1,2Ri-16</i>                    | 20.9 | 22   | 21.8 | 20.5 | 20.4 | 20.5 | 20.3 | 20.91   | 0.701 |
| <i>DdaFIG_1,2Ri-27</i>                    | 19.5 | 19.6 | 20.5 | 20   | 20.5 | 21   | 19.3 | 20.06   | 0.629 |

**PDA containing 0.02% SDS**

|                        |      |      |      |      |      |      |      |       |       |
|------------------------|------|------|------|------|------|------|------|-------|-------|
| WT                     | 15.6 | 15.4 | 14.7 | 14.8 | 15   | 15.8 | 15.1 | 15.2  | 0.412 |
| <i>DdaFIG_1Ri-25</i>   | 15   | 14.9 | 15.2 | 15.3 | 15   | 14.7 | 15.2 | 15.04 | 0.207 |
| <i>DdaFIG_1Ri-29</i>   | 15.4 | 15.4 | 15.3 | 14.8 | 14.9 | 15.6 | 15   | 15.2  | 0.3   |
| <i>DdaFIG_2Ri-31</i>   | 14.8 | 14.8 | 14.5 | 15   | 14.4 | 14.7 | 15.2 | 14.77 | 0.275 |
| <i>DdaFIG_2Ri-46</i>   | 14.7 | 15   | 13.9 | 14.8 | 14.8 | 14.5 | 14.6 | 14.61 | 0.353 |
| <i>DdaFIG_1,2Ri-16</i> | 17.6 | 18.2 | 17.6 | 18.5 | 18   | 18.6 | 18.4 | 18.13 | 0.411 |
| <i>DdaFIG_1,2Ri-27</i> | 17.8 | 17.5 | 16.8 | 16.6 | 18.2 | 16.5 | 17.2 | 17.23 | 0.640 |

---

**Table S9 Growth rate (colony diameter (mm)) of wild type (WT) strain and the mutants under osmotic stresses**

| Strain                           | Rep1 | Rep2 | Rep3 | Rep4 | Rep5 | Rep6 | Rep7 | Average | S.D.  |
|----------------------------------|------|------|------|------|------|------|------|---------|-------|
| <b>14-day-cultivation PDA</b>    |      |      |      |      |      |      |      |         |       |
| WT                               | 34.5 | 36.3 | 35.4 | 35   | 34.7 | 35.5 | 35.9 | 35.33   | 0.645 |
| <i>DdaFIG_1Ri-25</i>             | 32.3 | 31.6 | 31.9 | 31.4 | 32.1 | 31.5 | 30.5 | 31.61   | 0.59  |
| <i>DdaFIG_1Ri-29</i>             | 32.1 | 31   | 32   | 30.9 | 31.2 | 30.4 | 31.5 | 31.3    | 0.611 |
| <i>DdaFIG_2Ri-31</i>             | 31.4 | 33   | 32.4 | 31.8 | 31.5 | 32   | 31.5 | 31.94   | 0.583 |
| <i>DdaFIG_2Ri-46</i>             | 32   | 31.8 | 32.2 | 31.9 | 31.7 | 32.5 | 32.4 | 32.07   | 0.304 |
| <i>DdaFIG_1,2Ri-16</i>           | 26.4 | 26.8 | 25.7 | 26   | 25.5 | 25.6 | 25.7 | 25.96   | 0.479 |
| <i>DdaFIG_1,2Ri-27</i>           | 25.6 | 26.5 | 26.8 | 26.1 | 25.5 | 26.2 | 25.2 | 25.99   | 0.576 |
| <b>PDA containing 0.1 M NaCl</b> |      |      |      |      |      |      |      |         |       |
| WT                               | 29   | 28.9 | 28   | 27.8 | 28.4 | 29.1 | 28.5 | 28.53   | 0.502 |
| <i>DdaFIG_1Ri-25</i>             | 22.4 | 22.5 | 23   | 22.8 | 23.6 | 23.6 | 23.5 | 23.06   | 0.516 |
| <i>DdaFIG_1Ri-29</i>             | 22.4 | 23   | 24.1 | 23.8 | 23.9 | 22.2 | 22.5 | 23.13   | 0.795 |
| <i>DdaFIG_2Ri-31</i>             | 24.5 | 24.5 | 23.9 | 23.2 | 23   | 22.8 | 23.7 | 23.66   | 0.69  |
| <i>DdaFIG_2Ri-46</i>             | 23.9 | 24   | 24.2 | 23.5 | 22.9 | 23.1 | 22.7 | 23.47   | 0.585 |
| <i>DdaFIG_1,2Ri-16</i>           | 25.3 | 24.3 | 24.3 | 24.7 | 23.8 | 24.5 | 23.8 | 24.39   | 0.524 |
| <i>DdaFIG_1,2Ri-27</i>           | 24.5 | 24.6 | 24.7 | 25.1 | 25   | 23.5 | 24   | 24.49   | 0.564 |
| <b>PDA containing 0.2 M NaCl</b> |      |      |      |      |      |      |      |         |       |
| WT                               | 19.4 | 18.9 | 19.1 | 19.1 | 19.1 | 18.8 | 19.3 | 19.1    | 0.208 |
| <i>DdaFIG_1Ri-25</i>             | 14.2 | 14.3 | 14   | 15.1 | 15.2 | 14.3 | 15   | 14.59   | 0.495 |
| <i>DdaFIG_1Ri-29</i>             | 15.2 | 14.7 | 14.6 | 16.2 | 14.2 | 14.4 | 14   | 14.76   | 0.744 |
| <i>DdaFIG_2Ri-31</i>             | 14.6 | 14.9 | 15   | 14.5 | 15.2 | 14.5 | 16   | 14.96   | 0.532 |
| <i>DdaFIG_2Ri-46</i>             | 16.2 | 15.4 | 14.5 | 14.7 | 15   | 14.2 | 14   | 14.86   | 0.757 |
| <i>DdaFIG_1,2Ri-16</i>           | 16.8 | 15.7 | 17.6 | 18.3 | 17.5 | 16.9 | 17.4 | 17.17   | 0.816 |
| <i>DdaFIG_1,2Ri-27</i>           | 17.2 | 17.5 | 16.5 | 16.8 | 18   | 16.2 | 16   | 16.89   | 0.722 |
| <b>PDA containing 0.3 M NaCl</b> |      |      |      |      |      |      |      |         |       |
| WT                               | 13.9 | 13.6 | 13.8 | 13.6 | 13.7 | 13.5 | 14   | 13.72   | 0.18  |
| <i>DdaFIG_1Ri-25</i>             | 12.5 | 12.9 | 13.2 | 13.2 | 12.6 | 12.7 | 12.5 | 12.8    | 0.306 |
| <i>DdaFIG_1Ri-29</i>             | 13   | 12.8 | 13.1 | 13.2 | 13.5 | 12.4 | 12   | 12.86   | 0.509 |
| <i>DdaFIG_2Ri-31</i>             | 10.5 | 11.5 | 11   | 10.9 | 10.6 | 10.8 | 11.2 | 10.93   | 0.345 |
| <i>DdaFIG_2Ri-46</i>             | 11.6 | 11.5 | 10.5 | 10.6 | 10.8 | 10.7 | 11   | 10.96   | 0.435 |
| <i>DdaFIG_1,2Ri-16</i>           | 13.7 | 12.5 | 12.5 | 13   | 12.6 | 13.1 | 12.7 | 12.87   | 0.435 |
| <i>DdaFIG_1,2Ri-27</i>           | 13.3 | 12.9 | 13   | 12.8 | 12.5 | 12.7 | 13.1 | 12.9    | 0.265 |
| <b>PDA containing 0.1 M KCl</b>  |      |      |      |      |      |      |      |         |       |
| WT                               | 29.6 | 28.7 | 29.1 | 30.3 | 28.7 | 29.2 | 28.7 | 29.19   | 0.596 |
| <i>DdaFIG_1Ri-25</i>             | 25.8 | 26.9 | 26.9 | 27   | 26.5 | 26.7 | 26.5 | 26.61   | 0.38  |
| <i>DdaFIG_1Ri-29</i>             | 25.8 | 25.7 | 26.7 | 26.5 | 26.2 | 26   | 26.8 | 26.24   | 0.403 |
| <i>DdaFIG_2Ri-31</i>             | 27.8 | 28.5 | 28.2 | 29   | 28.6 | 29.1 | 28.3 | 28.5    | 0.421 |
| <i>DdaFIG_2Ri-46</i>             | 29   | 28.5 | 28.9 | 27.4 | 27.6 | 29.3 | 28.6 | 28.47   | 0.663 |
| <i>DdaFIG_1,2Ri-16</i>           | 24.5 | 23.6 | 22.8 | 23.5 | 23.3 | 23.4 | 23.2 | 23.47   | 0.452 |
| <i>DdaFIG_1,2Ri-27</i>           | 22.9 | 23.2 | 24   | 22.6 | 23.8 | 23   | 22.6 | 23.16   | 0.48  |
| <b>PDA containing 0.2 M KCl</b>  |      |      |      |      |      |      |      |         |       |

|                                      |      |      |      |      |      |      |      |       |       |
|--------------------------------------|------|------|------|------|------|------|------|-------|-------|
| WT                                   | 21   | 21.7 | 21.2 | 20.9 | 20.9 | 21.2 | 20.5 | 21.06 | 0.369 |
| <i>DdaFIG_1Ri-25</i>                 | 18.5 | 19   | 20.2 | 18.7 | 17.6 | 18.1 | 18.4 | 18.64 | 0.756 |
| <i>DdaFIG_1Ri-29</i>                 | 17.6 | 18   | 18.8 | 19   | 18.9 | 18.3 | 17.8 | 18.34 | 0.523 |
| <i>DdaFIG_2Ri-31</i>                 | 23   | 23.5 | 22.9 | 22.8 | 23.1 | 22.5 | 22.7 | 22.93 | 0.296 |
| <i>DdaFIG_2Ri-46</i>                 | 23   | 23.1 | 23.5 | 22.8 | 22.7 | 23.2 | 22.3 | 22.94 | 0.368 |
| <i>DdaFIG_1,2Ri-16</i>               | 20   | 20.4 | 20.4 | 20.7 | 19.8 | 20   | 19.4 | 20.1  | 0.377 |
| <i>DdaFIG_1,2Ri-27</i>               | 20.2 | 19.5 | 19.6 | 20.4 | 19.5 | 20   | 20.3 | 19.93 | 0.338 |
| <b>PDA containing 0.3 M KCl</b>      |      |      |      |      |      |      |      |       |       |
| WT                                   | 14.6 | 14.2 | 15   | 15.1 | 14.8 | 14.5 | 15.5 | 14.81 | 0.43  |
| <i>DdaFIG_1Ri-25</i>                 | 12.6 | 13.4 | 14   | 12.5 | 12   | 13   | 12.9 | 12.91 | 0.601 |
| <i>DdaFIG_1Ri-29</i>                 | 13.4 | 13.3 | 12.9 | 12.5 | 13   | 12.5 | 13.2 | 12.97 | 0.337 |
| <i>DdaFIG_2Ri-31</i>                 | 15.6 | 15.5 | 15.8 | 15.9 | 15.5 | 16.2 | 15.8 | 15.76 | 0.232 |
| <i>DdaFIG_2Ri-46</i>                 | 14.9 | 15.5 | 16.2 | 16   | 15.4 | 14.8 | 15.9 | 15.53 | 0.501 |
| <i>DdaFIG_1,2Ri-16</i>               | 14.3 | 13.8 | 15.2 | 14.1 | 14.5 | 13.8 | 14.2 | 14.27 | 0.417 |
| <i>DdaFIG_1,2Ri-27</i>               | 14.3 | 13.5 | 14.2 | 14.2 | 13.9 | 14.5 | 13.7 | 14.04 | 0.308 |
| <b>PDA containing 0.2 M Sorbitol</b> |      |      |      |      |      |      |      |       |       |
| WT                                   | 31.4 | 32.5 | 30.9 | 31.4 | 30.5 | 31.5 | 31.6 | 31.4  | 0.622 |
| <i>DdaFIG_1Ri-25</i>                 | 28.2 | 27.8 | 28.7 | 28.8 | 27.5 | 28   | 28.3 | 28.19 | 0.432 |
| <i>DdaFIG_1Ri-29</i>                 | 27.9 | 28.5 | 28.7 | 29   | 28.3 | 27.5 | 28.3 | 28.31 | 0.461 |
| <i>DdaFIG_2Ri-31</i>                 | 30.5 | 29.7 | 28.8 | 30.7 | 30   | 29.6 | 29.2 | 29.79 | 0.623 |
| <i>DdaFIG_2Ri-46</i>                 | 30.1 | 29.2 | 28.5 | 29.5 | 31   | 29.3 | 30.2 | 29.69 | 0.755 |
| <i>DdaFIG_1,2Ri-16</i>               | 26.4 | 25.8 | 26.4 | 26.5 | 26.7 | 25.9 | 26.5 | 26.31 | 0.309 |
| <i>DdaFIG_1,2Ri-27</i>               | 25.5 | 26.2 | 26.5 | 26   | 26.5 | 26.2 | 26.8 | 26.24 | 0.389 |
| <b>PDA containing 0.5 M Sorbitol</b> |      |      |      |      |      |      |      |       |       |
| WT                                   | 28.5 | 27.2 | 28.1 | 28.2 | 28.5 | 27.9 | 27.1 | 27.93 | 0.574 |
| <i>DdaFIG_1Ri-25</i>                 | 26.3 | 25.8 | 25.3 | 26   | 25   | 25.3 | 24.9 | 25.51 | 0.489 |
| <i>DdaFIG_1Ri-29</i>                 | 26.2 | 25.7 | 24.5 | 25.5 | 26.6 | 24.6 | 24.2 | 25.33 | 0.848 |
| <i>DdaFIG_2Ri-31</i>                 | 27.6 | 27.6 | 26.9 | 27.5 | 28.1 | 27.9 | 27.5 | 27.56 | 0.348 |
| <i>DdaFIG_2Ri-46</i>                 | 26.9 | 27.3 | 27   | 28   | 26.6 | 27.8 | 27.9 | 27.36 | 0.51  |
| <i>DdaFIG_1,2Ri-16</i>               | 23.9 | 25.1 | 23.4 | 24.1 | 25.1 | 23.8 | 24.4 | 24.26 | 0.602 |
| <i>DdaFIG_1,2Ri-27</i>               | 24   | 24.3 | 25.2 | 24   | 23.8 | 23.6 | 23.8 | 24.1  | 0.493 |
| <b>PDA containing 0.8 M Sorbitol</b> |      |      |      |      |      |      |      |       |       |
| WT                                   | 24.3 | 24.2 | 25.4 | 25.6 | 24.3 | 24.5 | 25.7 | 24.86 | 0.675 |
| <i>DdaFIG_1Ri-25</i>                 | 21.8 | 22.8 | 23.3 | 21.2 | 21.4 | 22.2 | 21.5 | 22.03 | 0.723 |
| <i>DdaFIG_1Ri-29</i>                 | 21.6 | 21.2 | 22.3 | 21.8 | 21   | 22   | 21.1 | 21.57 | 0.456 |
| <i>DdaFIG_2Ri-31</i>                 | 24.5 | 25.1 | 25.1 | 24.7 | 25.2 | 23.8 | 24.5 | 24.7  | 0.457 |
| <i>DdaFIG_2Ri-46</i>                 | 23.8 | 24.5 | 25   | 25   | 24.2 | 24.9 | 25.4 | 24.69 | 0.508 |
| <i>DdaFIG_1,2Ri-16</i>               | 24.1 | 23.5 | 24.3 | 22.8 | 23.5 | 24.2 | 23.9 | 23.76 | 0.489 |
| <i>DdaFIG_1,2Ri-27</i>               | 23.5 | 23.7 | 22.8 | 23.4 | 23.3 | 22.8 | 24.1 | 23.37 | 0.433 |

**Table S10 Growth rate (colony diameter (mm)) of wild type (WT) strain and the mutants under oxidative stress**

| Strain                                                  | Rep1 | Rep2 | Rep3 | Rep4 | Rep5 | Rep6 | Rep7 | Average | S.D.  |
|---------------------------------------------------------|------|------|------|------|------|------|------|---------|-------|
| <b>14-day-cultivation PDA</b>                           |      |      |      |      |      |      |      |         |       |
| WT                                                      | 37.6 | 38   | 36.9 | 37.2 | 37.5 | 37.5 | 38.2 | 37.56   | 0.443 |
| <i>DdaFIG_1Ri-25</i>                                    | 32.5 | 33.6 | 32.8 | 33.2 | 33.3 | 32.9 | 33   | 33.04   | 0.360 |
| <i>DdaFIG_1Ri-29</i>                                    | 33.4 | 32.8 | 33   | 33.5 | 32.8 | 33.8 | 33   | 33.19   | 0.385 |
| <i>DdaFIG_2Ri-31</i>                                    | 32.8 | 33.5 | 33.4 | 33.6 | 32.8 | 31.9 | 33.6 | 33.09   | 0.628 |
| <i>DdaFIG_2Ri-46</i>                                    | 33.1 | 33.5 | 32.9 | 33   | 34   | 33.8 | 33   | 33.33   | 0.439 |
| <i>DdaFIG_1,2Ri-16</i>                                  | 25.7 | 26.5 | 27.1 | 26.6 | 25.9 | 26.2 | 26.8 | 26.40   | 0.497 |
| <i>DdaFIG_1,2Ri-27</i>                                  | 26.5 | 27   | 27.5 | 25.8 | 26.2 | 25.8 | 26.4 | 26.46   | 0.621 |
| <b>PDA containing 0.001% H<sub>2</sub>O<sub>2</sub></b> |      |      |      |      |      |      |      |         |       |
| WT                                                      | 32.3 | 32.2 | 32.8 | 31.9 | 32   | 31.5 | 33.8 | 32.36   | 0.695 |
| <i>DdaFIG_1Ri-25</i>                                    | 28   | 27.8 | 28   | 26.2 | 28.5 | 27.5 | 28.6 | 27.8    | 0.743 |
| <i>DdaFIG_1Ri-29</i>                                    | 27.5 | 28.5 | 28   | 29.1 | 28.3 | 29.3 | 26.9 | 28.23   | 0.787 |
| <i>DdaFIG_2Ri-31</i>                                    | 34.6 | 33.5 | 32.3 | 32   | 32.8 | 33.5 | 32   | 32.96   | 0.893 |
| <i>DdaFIG_2Ri-46</i>                                    | 32.8 | 33.4 | 32.8 | 34   | 33.7 | 33.6 | 34.2 | 33.5    | 0.504 |
| <i>DdaFIG_1,2Ri-16</i>                                  | 31   | 30.8 | 31.5 | 30   | 31.4 | 30.6 | 31.8 | 31.01   | 0.567 |
| <i>DdaFIG_1,2Ri-27</i>                                  | 30.6 | 30.5 | 31.6 | 30.5 | 30   | 30.4 | 29.6 | 30.46   | 0.57  |
| <b>PDA containing 0.003% H<sub>2</sub>O<sub>2</sub></b> |      |      |      |      |      |      |      |         |       |
| WT                                                      | 30   | 31   | 30.8 | 29.2 | 30.4 | 30.4 | 29.6 | 30.2    | 0.595 |
| <i>DdaFIG_1Ri-25</i>                                    | 26.4 | 25.7 | 27.5 | 27   | 25.8 | 26.3 | 25   | 26.24   | 0.776 |
| <i>DdaFIG_1Ri-29</i>                                    | 26.6 | 26.7 | 27.4 | 26   | 27.2 | 26.5 | 25.6 | 26.57   | 0.582 |
| <i>DdaFIG_2Ri-31</i>                                    | 28.1 | 28   | 27.5 | 28   | 29.4 | 29.6 | 28.5 | 28.44   | 0.723 |
| <i>DdaFIG_2Ri-46</i>                                    | 28.9 | 27.5 | 29   | 29.4 | 31   | 28.5 | 29.2 | 29.07   | 0.976 |
| <i>DdaFIG_1,2Ri-16</i>                                  | 27.4 | 28.6 | 28.2 | 27.9 | 28.4 | 28.4 | 28.3 | 28.17   | 0.373 |
| <i>DdaFIG_1,2Ri-27</i>                                  | 28.2 | 28.5 | 28.4 | 29.2 | 28   | 27.8 | 28   | 28.3    | 0.431 |

**Table S11 Growth rate (colony diameter (mm)) of wild type (WT) strain and the mutants under low temperature**

| Strain                         | Rep1 | Rep2 | Rep3 | Rep4 | Rep5 | Rep6 | Rep7 | Average | S.D.  |
|--------------------------------|------|------|------|------|------|------|------|---------|-------|
| <b>14-day-cultivation PDA</b>  |      |      |      |      |      |      |      |         |       |
| WT                             | 37.6 | 38   | 36.9 | 37.2 | 37.5 | 37.5 | 38.2 | 37.56   | 0.443 |
| <i>DdaFIG_1Ri-25</i>           | 32.5 | 33.6 | 32.8 | 33.2 | 33.3 | 32.9 | 33   | 33.04   | 0.360 |
| <i>DdaFIG_1Ri-29</i>           | 33.4 | 32.8 | 33   | 33.5 | 32.8 | 33.8 | 33   | 33.19   | 0.385 |
| <i>DdaFIG_2Ri-31</i>           | 32.8 | 33.5 | 33.4 | 33.6 | 32.8 | 31.9 | 33.6 | 33.09   | 0.628 |
| <i>DdaFIG_2Ri-46</i>           | 33.1 | 33.5 | 32.9 | 33   | 34   | 33.8 | 33   | 33.33   | 0.439 |
| <i>DdaFIG_1,2Ri-16</i>         | 25.7 | 26.5 | 27.1 | 26.6 | 25.9 | 26.2 | 26.8 | 26.40   | 0.497 |
| <i>DdaFIG_1,2Ri-27</i>         | 26.5 | 27   | 27.5 | 25.8 | 26.2 | 25.8 | 26.4 | 26.46   | 0.621 |
| <b>Cultivation under 15 °C</b> |      |      |      |      |      |      |      |         |       |
| WT                             | 17.6 | 18   | 17.8 | 17   | 16.9 | 17.5 | 17.2 | 17.43   | 0.411 |
| <i>DdaFIG_1Ri-25</i>           | 19.2 | 18.5 | 18.2 | 20.6 | 20   | 20   | 19.6 | 19.44   | 0.864 |
| <i>DdaFIG_1Ri-29</i>           | 18.2 | 18.5 | 19.5 | 20.2 | 20.5 | 19.4 | 20.4 | 19.53   | 0.912 |
| <i>DdaFIG_2Ri-31</i>           | 16.4 | 18   | 16.5 | 16.3 | 17   | 16.3 | 16.4 | 16.7    | 0.622 |
| <i>DdaFIG_2Ri-46</i>           | 16.7 | 16.5 | 16.9 | 16.4 | 15.8 | 17.2 | 16.5 | 16.57   | 0.439 |
| <i>DdaFIG_1,2Ri-16</i>         | 13.4 | 13.3 | 12.9 | 13.2 | 13.4 | 12.5 | 12.8 | 13.07   | 0.345 |
| <i>DdaFIG_1,2Ri-27</i>         | 13.5 | 12.6 | 13.5 | 12.2 | 12.6 | 12.5 | 13.2 | 12.87   | 0.522 |

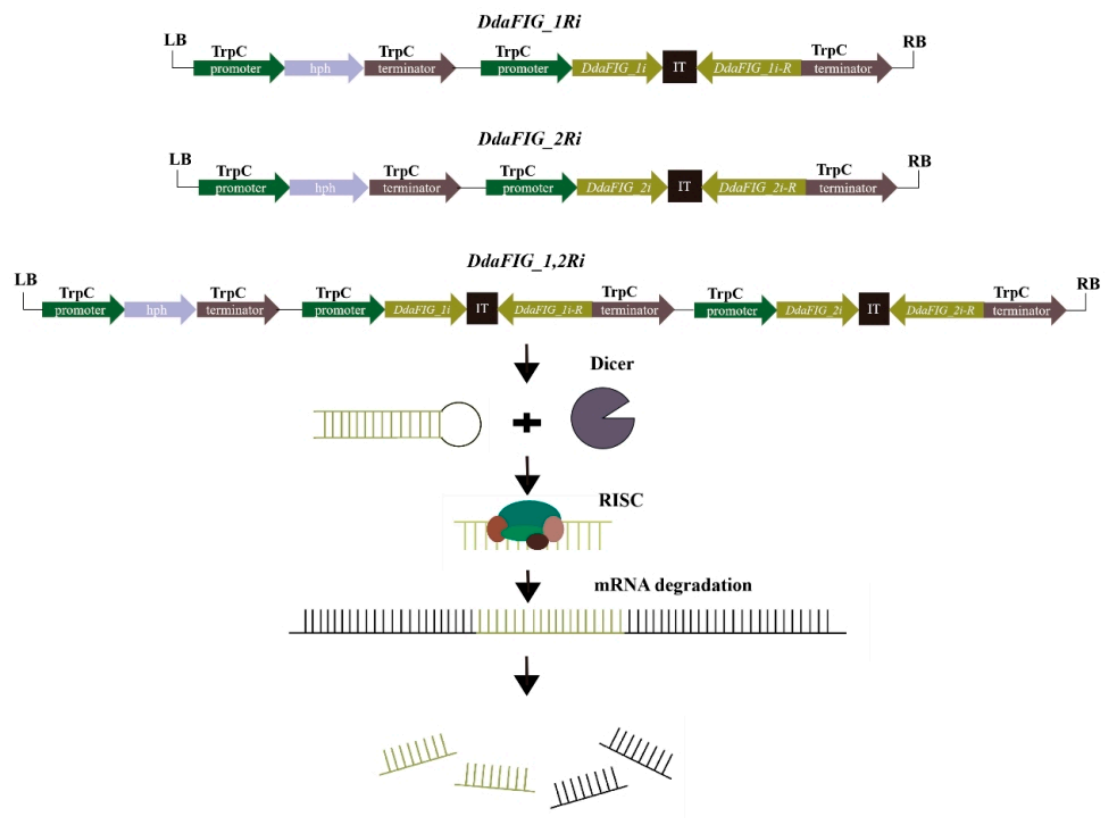

**Figure S1.** Schematic diagram of the constructs used for suppressing the expression of *DdaFIG\_1* and *DdaFIG\_2* via RNAi

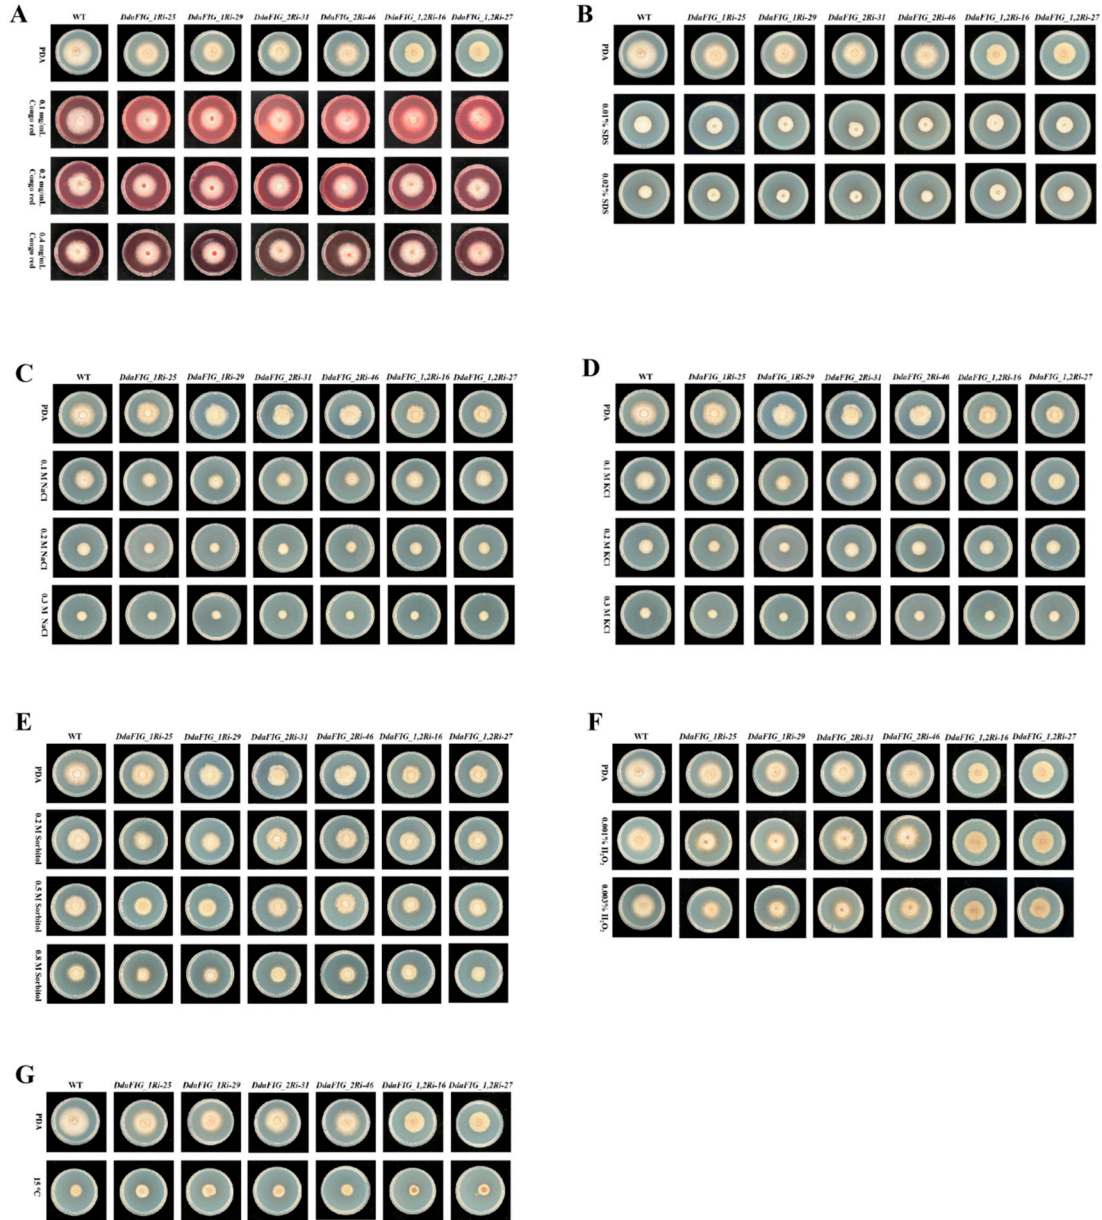

**Figure S2.** Colony morphology of the WT strain and transformants carrying individual RNAi constructs under diverse abiotic stresses. (A–G) Colony growth and morphology on PDA containing Congo red, SDS, NaCl, KCl, sorbitol, H<sub>2</sub>O<sub>2</sub> and growth at 15 °C. \*\* means  $p$ -values < 0.01, two-tailed  $t$ -test,  $n = 7$ .
